# Supplementary material for: Quantum chemical topology and natural bond orbital analysis of M–O covalency in M(OC6H5)4 (M = Ti, Zr, Hf, Ce, Th, Pa, U, Np)
Source: Royal Society of Chemistry journal article supplement (doi:10.1039/d0cp02947e), 2020-01-01
Supplement: d0cp02947e1.pdf [file d0cp02947e1.pdf]

## Supplementary information for

# Quantum Chemical Topology and Natural Bond Orbital Analysis of M-O Covalency in $M(\text{OC}_6\text{H}_5)_4$ ( $M = \text{Ti, Zr, Hf, Ce, Th, Pa, U, Np}$ )

Victoria E. J. Berryman,<sup>\*a</sup> Jacob J. Shephard,<sup>b</sup> Tatsumi Ochiai,<sup>c,d</sup> Amy Price,<sup>c</sup> Polly L. Arnold,<sup>c,d</sup> Simon Parsons,<sup>b</sup>  
and Nikolas Kaltsoyannis<sup>\*a</sup>

<sup>a</sup>Department of Chemistry, School of Natural Sciences, The University of Manchester, Oxford Road, Manchester, UK, M13 9PL.

<sup>b</sup>EaStCHEM School of Chemistry and The Centre for Science at Extreme Conditions. The University of Edinburgh, King's Buildings, West Mains Road, Edinburgh, UK, EH9 3FJ.

<sup>c</sup>EaStCHEM School of Chemistry, The University of Edinburgh, King's Buildings, West Mains Road, Edinburgh, UK, EH9 3FJ.

<sup>d</sup>Department of Chemistry, University of California, Berkeley, Berkeley CA 94720, USA. Chemical Sciences Division, Lawrence Berkeley National Laboratory, One Cyclotron Road, Berkeley 94720, USA.

Invited contribution to the **Quantum Theory: The challenge of Transition Metal Complexes** themed collection of *Physical Chemistry Chemical Physics*.

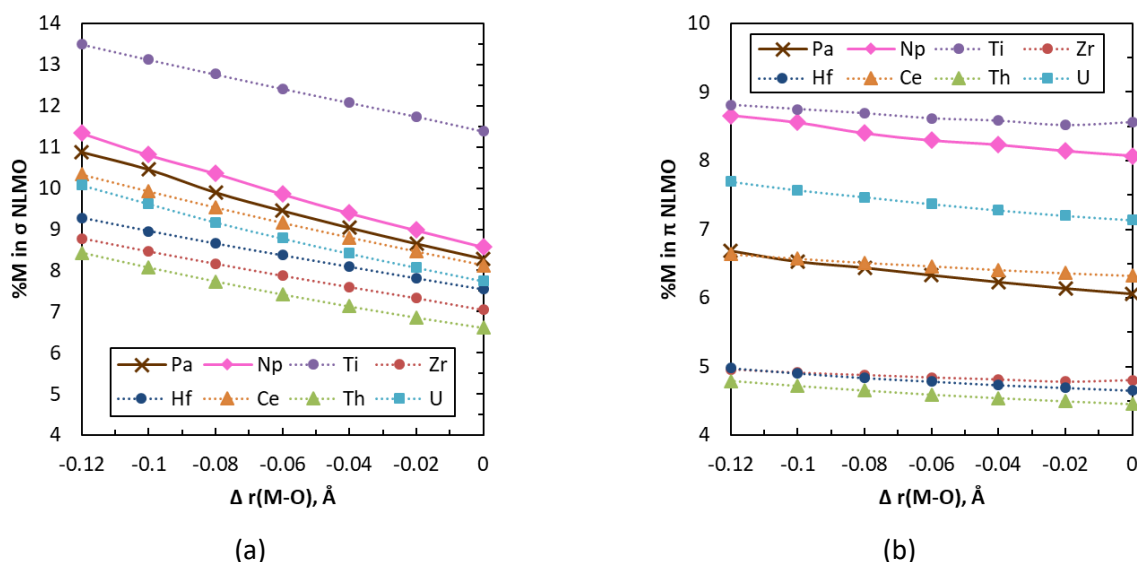

Figure S1. The metal contribution (%M) to the  $\sigma$ -type (a) and  $\pi$ -type (b) M-O bonding NLMOs as a function of  $r(\text{M-O})$  in  $\text{M}(\text{OC}_6\text{H}_5)_4$ .

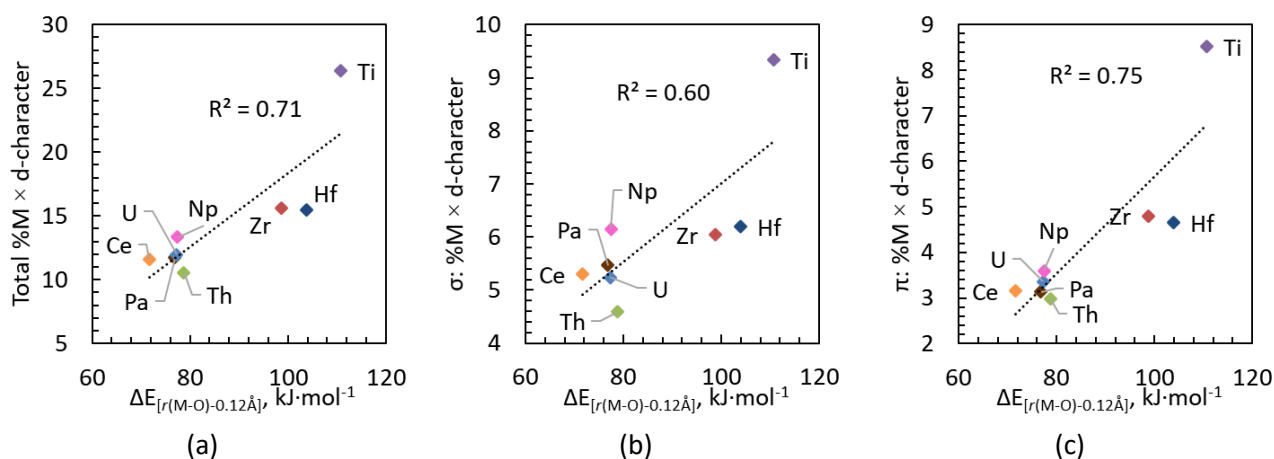

Figure S2. Correlation between the deformation energy and %M contribution from d-character orbitals in (a), decomposed into  $\sigma$ -type NLMOs in (b) and  $\pi$ -type NLMOs in (c).

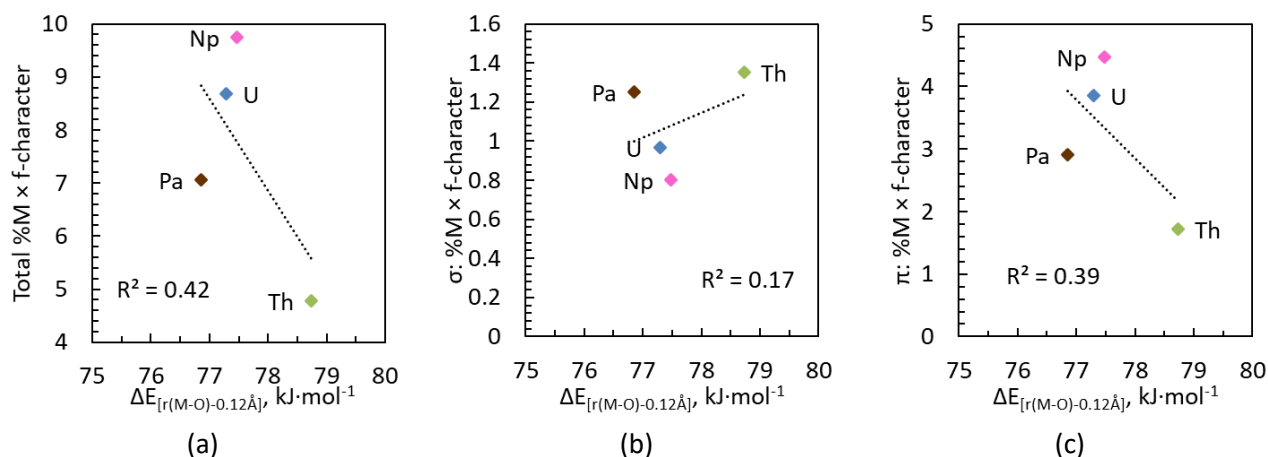

Figure S3. Correlation for the actinides between the deformation energy and %M contribution from f-character orbitals in (a), decomposed into  $\sigma$ -type NLMOs in (b) and  $\pi$ -type NLMOs in (c).

Table S1: QTAIM and NBO atomic charges with shortening of  $r(\text{M-O})$  in  $\text{M}(\text{OC}_6\text{H}_5)_4$ .

|                                              |           | QTAIM atomic charge, au |               |                             | NBO atomic charge, au |               |                             |
|----------------------------------------------|-----------|-------------------------|---------------|-----------------------------|-----------------------|---------------|-----------------------------|
|                                              |           | $q(\text{M})$           | $q(\text{O})$ | $q(\text{M}) - q(\text{O})$ | $q(\text{M})$         | $q(\text{O})$ | $q(\text{M}) - q(\text{O})$ |
| Ti( $\text{OC}_6\text{H}_5$ ) <sub>4</sub> : | Optimized | 2.327                   | -1.228        | 1.099                       | 1.703                 | -0.675        | 1.027                       |
|                                              | -0.02 Å   | 2.327                   | -1.226        | 1.101                       | 1.681                 | -0.669        | 1.012                       |
|                                              | -0.04 Å   | 2.324                   | -1.223        | 1.101                       | 1.657                 | -0.662        | 0.995                       |
|                                              | -0.06 Å   | 2.320                   | -1.220        | 1.100                       | 1.634                 | -0.655        | 0.979                       |
|                                              | -0.08 Å   | 2.314                   | -1.217        | 1.097                       | 1.609                 | -0.648        | 0.961                       |
|                                              | -0.10 Å   | 2.308                   | -1.213        | 1.095                       | 1.583                 | -0.640        | 0.943                       |
|                                              | -0.12 Å   | 2.299                   | -1.208        | 1.091                       | 1.554                 | -0.631        | 0.923                       |
| Zr( $\text{OC}_6\text{H}_5$ ) <sub>4</sub> : | Optimized | 2.681                   | -1.293        | 1.388                       | 2.657                 | -0.893        | 1.764                       |
|                                              | -0.02 Å   | 2.683                   | -1.293        | 1.391                       | 2.645                 | -0.890        | 1.755                       |
|                                              | -0.04 Å   | 2.684                   | -1.292        | 1.393                       | 2.631                 | -0.886        | 1.745                       |
|                                              | -0.06 Å   | 2.685                   | -1.290        | 1.394                       | 2.615                 | -0.881        | 1.734                       |
|                                              | -0.08 Å   | 2.684                   | -1.288        | 1.396                       | 2.596                 | -0.875        | 1.720                       |
|                                              | -0.10 Å   | 2.683                   | -1.286        | 1.397                       | 2.575                 | -0.869        | 1.706                       |
|                                              | -0.12 Å   | 2.680                   | -1.283        | 1.397                       | 2.552                 | -0.863        | 1.690                       |
| Hf( $\text{OC}_6\text{H}_5$ ) <sub>4</sub> : | Optimized | 2.742                   | -1.308        | 1.434                       | 2.648                 | -0.891        | 1.758                       |
|                                              | -0.02 Å   | 2.740                   | -1.307        | 1.433                       | 2.631                 | -0.886        | 1.745                       |
|                                              | -0.04 Å   | 2.737                   | -1.305        | 1.432                       | 2.612                 | -0.881        | 1.731                       |
|                                              | -0.06 Å   | 2.733                   | -1.303        | 1.430                       | 2.590                 | -0.875        | 1.716                       |
|                                              | -0.08 Å   | 2.728                   | -1.301        | 1.427                       | 2.567                 | -0.868        | 1.699                       |
|                                              | -0.10 Å   | 2.722                   | -1.297        | 1.424                       | 2.541                 | -0.861        | 1.681                       |
|                                              | -0.12 Å   | 2.715                   | -1.294        | 1.421                       | 2.513                 | -0.853        | 1.661                       |
| Ce( $\text{OC}_6\text{H}_5$ ) <sub>4</sub> : | Optimized | 2.488                   | -1.240        | 1.248                       | 2.212                 | -0.790        | 1.423                       |
|                                              | -0.02 Å   | 2.490                   | -1.237        | 1.253                       | 2.194                 | -0.784        | 1.410                       |
|                                              | -0.04 Å   | 2.493                   | -1.235        | 1.258                       | 2.174                 | -0.778        | 1.396                       |
|                                              | -0.06 Å   | 2.495                   | -1.233        | 1.262                       | 2.151                 | -0.771        | 1.380                       |
|                                              | -0.08 Å   | 2.496                   | -1.230        | 1.266                       | 2.127                 | -0.764        | 1.363                       |
|                                              | -0.10 Å   | 2.497                   | -1.227        | 1.270                       | 2.100                 | -0.756        | 1.344                       |
|                                              | -0.12 Å   | 2.498                   | -1.224        | 1.273                       | 2.071                 | -0.748        | 1.324                       |
| Th( $\text{OC}_6\text{H}_5$ ) <sub>4</sub> : | Optimized | 2.841                   | -1.305        | 1.537                       | 2.692                 | -0.898        | 1.795                       |
|                                              | -0.02 Å   | 2.841                   | -1.303        | 1.538                       | 2.674                 | -0.893        | 1.781                       |
|                                              | -0.04 Å   | 2.841                   | -1.301        | 1.539                       | 2.653                 | -0.887        | 1.766                       |
|                                              | -0.06 Å   | 2.840                   | -1.300        | 1.541                       | 2.629                 | -0.880        | 1.749                       |
|                                              | -0.08 Å   | 2.839                   | -1.298        | 1.542                       | 2.603                 | -0.873        | 1.731                       |
|                                              | -0.10 Å   | 2.839                   | -1.296        | 1.543                       | 2.575                 | -0.865        | 1.710                       |
|                                              | -0.12 Å   | 2.838                   | -1.293        | 1.545                       | 2.543                 | -0.856        | 1.688                       |
| Pa( $\text{OC}_6\text{H}_5$ ) <sub>4</sub> : | Optimized | 2.725                   | -1.286        | 1.439                       | 2.311                 | -0.821        | 1.490                       |
|                                              | -0.02 Å   | 2.725                   | -1.285        | 1.440                       | 2.274                 | -0.813        | 1.462                       |
|                                              | -0.04 Å   | 2.725                   | -1.283        | 1.441                       | 2.234                 | -0.803        | 1.431                       |
|                                              | -0.06 Å   | 2.725                   | -1.282        | 1.443                       | 2.191                 | -0.793        | 1.398                       |
|                                              | -0.08 Å   | 2.726                   | -1.281        | 1.445                       | 2.143                 | -0.781        | 1.362                       |
|                                              | -0.10 Å   | 2.727                   | -1.279        | 1.448                       | 2.091                 | -0.769        | 1.322                       |
|                                              | -0.12 Å   | 2.729                   | -1.278        | 1.452                       | 2.035                 | -0.755        | 1.280                       |
| U( $\text{OC}_6\text{H}_5$ ) <sub>4</sub> :  | Optimized | 2.635                   | -1.266        | 1.369                       | 2.248                 | -0.800        | 1.449                       |
|                                              | -0.02 Å   | 2.632                   | -1.264        | 1.368                       | 2.219                 | -0.792        | 1.426                       |
|                                              | -0.04 Å   | 2.630                   | -1.262        | 1.368                       | 2.186                 | -0.784        | 1.402                       |
|                                              | -0.06 Å   | 2.627                   | -1.260        | 1.368                       | 2.150                 | -0.775        | 1.375                       |
|                                              | -0.08 Å   | 2.624                   | -1.257        | 1.367                       | 2.110                 | -0.765        | 1.346                       |
|                                              | -0.10 Å   | 2.621                   | -1.255        | 1.367                       | 2.068                 | -0.754        | 1.314                       |
|                                              | -0.12 Å   | 2.618                   | -1.252        | 1.367                       | 2.021                 | -0.742        | 1.280                       |
| Np( $\text{OC}_6\text{H}_5$ ) <sub>4</sub> : | Optimized | 2.561                   | -1.251        | 1.309                       | 2.046                 | -0.757        | 1.289                       |
|                                              | -0.02 Å   | 2.559                   | -1.249        | 1.310                       | 2.003                 | -0.746        | 1.257                       |
|                                              | -0.04 Å   | 2.557                   | -1.247        | 1.310                       | 1.959                 | -0.735        | 1.223                       |
|                                              | -0.06 Å   | 2.554                   | -1.244        | 1.310                       | 1.910                 | -0.723        | 1.187                       |
|                                              | -0.08 Å   | 2.551                   | -1.241        | 1.309                       | 1.858                 | -0.711        | 1.147                       |
|                                              | -0.10 Å   | 2.547                   | -1.238        | 1.308                       | 1.804                 | -0.697        | 1.106                       |
|                                              | -0.12 Å   | 2.542                   | -1.235        | 1.307                       | 1.746                 | -0.683        | 1.063                       |

Table S2. QTAIM and IQA metrics (in au) for the  $M(\text{OC}_6\text{H}_5)_4$  systems at  $-0.12 \text{ \AA}$ .

| Compound                                   | $r(\text{M-O}), \text{ \AA}$ | $\rho_{\text{BCP}}$ | $\nabla^2 \rho_{\text{BCP}}$ | $-(G_{\text{BCP}}/V_{\text{BCP}})$ | $H_{\text{BCP}}$ | $\delta(\text{M,O})$ | $V_{\text{XC}}(\text{M,O})$ | $\%V_{\text{XC}}$ |
|--------------------------------------------|------------------------------|---------------------|------------------------------|------------------------------------|------------------|----------------------|-----------------------------|-------------------|
| Ti( $\text{OC}_6\text{H}_5$ ) <sub>4</sub> | 1.665                        | 0.198               | 1.067                        | 0.802                              | -0.087           | 0.831                | -0.210                      | 21.5              |
| Zr( $\text{OC}_6\text{H}_5$ ) <sub>4</sub> | 1.817                        | 0.160               | 0.853                        | 0.814                              | -0.063           | 0.749                | -0.179                      | 16.4              |
| Hf( $\text{OC}_6\text{H}_5$ ) <sub>4</sub> | 1.799                        | 0.177               | 1.041                        | 0.811                              | -0.066           | 0.731                | -0.178                      | 16.5              |
| Ce( $\text{OC}_6\text{H}_5$ ) <sub>4</sub> | 1.966                        | 0.147               | 0.526                        | 0.749                              | -0.066           | 0.904                | -0.206                      | 21.2              |
| Th( $\text{OC}_6\text{H}_5$ ) <sub>4</sub> | 2.027                        | 0.138               | 0.491                        | 0.750                              | -0.061           | 0.824                | -0.190                      | 17.2              |
| Pa( $\text{OC}_6\text{H}_5$ ) <sub>4</sub> | 1.981                        | 0.163               | 0.545                        | 0.724                              | -0.084           | 0.979                | -0.223                      | 20.2              |
| U( $\text{OC}_6\text{H}_5$ ) <sub>4</sub>  | 1.968                        | 0.165               | 0.598                        | 0.738                              | -0.082           | 0.976                | -0.224                      | 21.3              |
| Np( $\text{OC}_6\text{H}_5$ ) <sub>4</sub> | 1.960                        | 0.164               | 0.644                        | 0.749                              | -0.081           | 0.972                | -0.222                      | 21.9              |

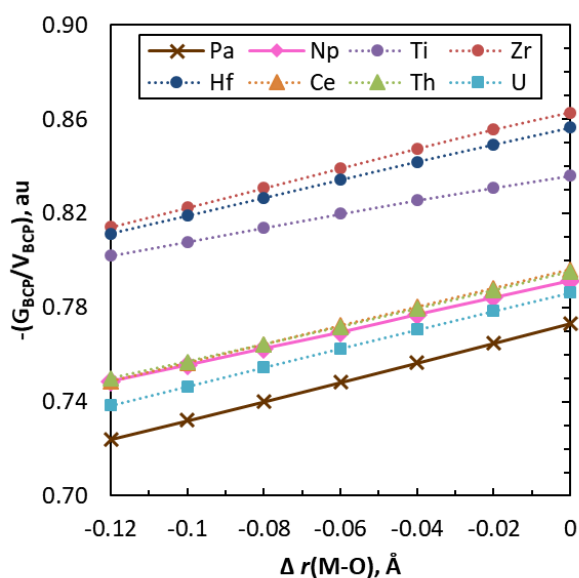

Figure S4. The  $-(G_{\text{BCP}}/V_{\text{BCP}})$  for the M-O bond as a function of  $r(\text{M-O})$  in  $M(\text{OC}_6\text{H}_5)_4$ .

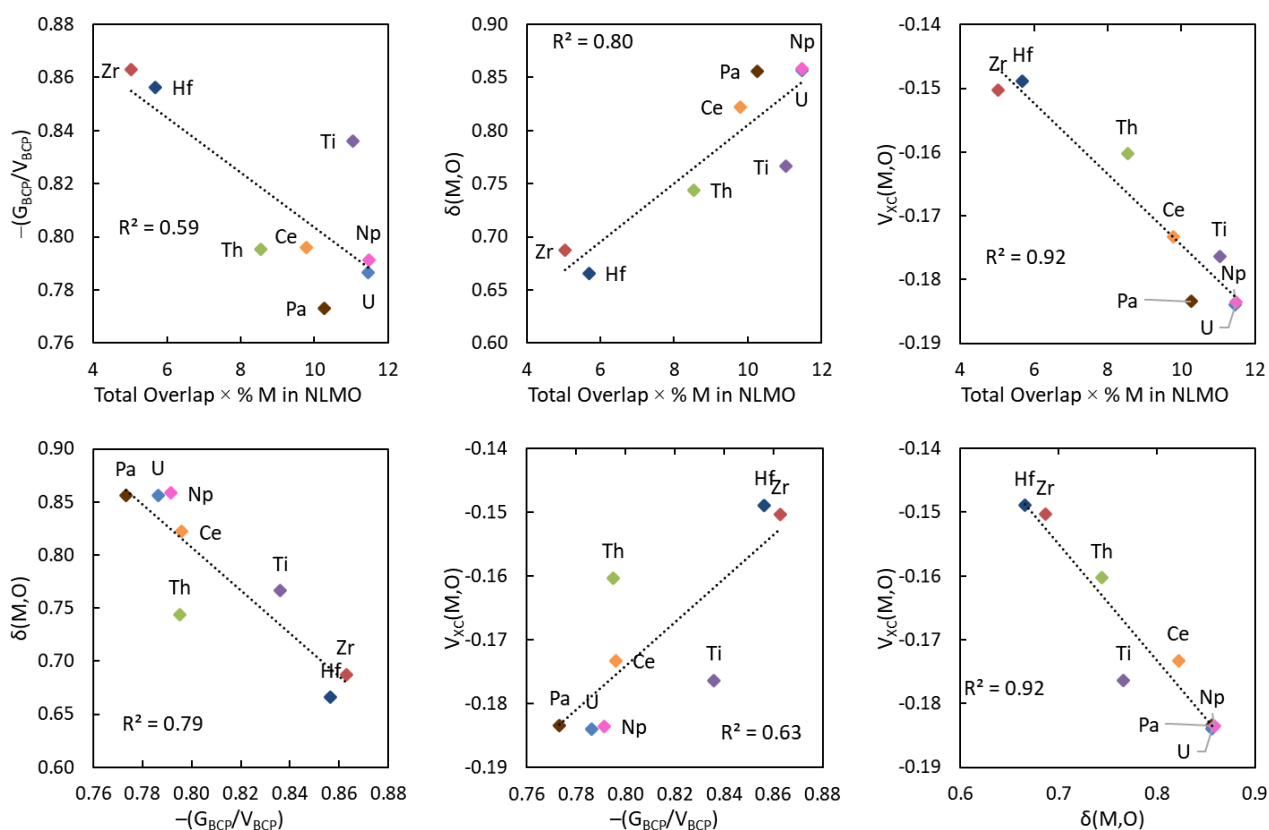

Figure S5. Correlations for the covalency metrics summarized in Table 4.

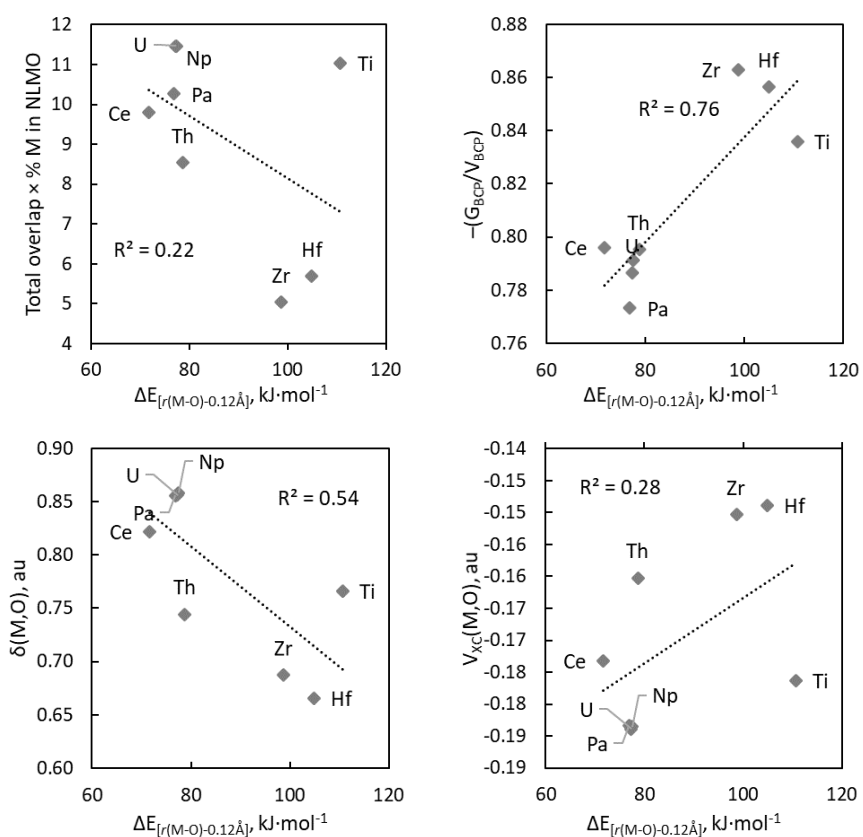

Figure S6. Correlation between covalency metrics and deformation energy.
